# Supplementary material for: Development of an orally-administrable tumor vasculature-targeting therapeutic using annexin A1-binding D-peptides
Source: PubMed Central journal article supplement (PMC7787448; doi:10.1371/journal.pone.0241157), 2021-01-06
Supplement: pone.0241157.s001.pdf [file pone.0241157.s001.pdf]

cagggtggcacttttcggggaaatgtgcgcggaaccctatttgtttatttttctaatacattcaaatatgtatccgctcatgagacaataaccctgataa  
atgcttcaataatattgaaaaaggaagagatgagatattcaacatttccgtgctgccttattccctttttgcggcattttgccttctgttttgcacc  
cagaaacgctgggtgaaagtaaaagatgtgaagatcagttgggtgcacgagtggttacatcgaactggatctcaacagcggtgaagatccttgagag  
tttcgccccgaagaaacgtttccaatgatgagcacttttaaagtctgctatgtggcgcggtattatcccgtattgacgccgggcaagagcaactcgg  
cgccgcatacactattctcagaatgacttgggtgagtagtaccagtcacagaaaagcatcttacggatggcatgacagtaagagaattatgacgtgc  
tgccataacctgatgataacactgcgccaacttacttctgacaacgatcggaggaccgaaggagtaaccgctttttgcaacaatgggggagc  
atgtaactgccttgatcgttgggaaccggagctgaatgaagccatacacaacgacgagcgtgacaccacgatgcctgtagcaatggcaacaacgtt  
gcgcaactattaactggcgaactacttactgacttcccggcaacaattaactgactggatggaggcgataaagttgcaggaccacttctgcgctc  
ggccttccggctggctgtttattgtgataaatctggagccggtagcgtgggtctcgcggtatcattgcagcactggggccagatggtaagccctc  
ccgtatcgtagttatctacacgacggggagtcaggcaactatggatgaacgaaatagacagatcgtgagataggtgcctcactgattaagcattggt  
aactgtcagaccaagttactcatatatactttagattgatttaaaactcatttttaatttaaaaggatctaggtgaagatccttttgataatctcatga  
ccaaaatccctaacgtgagtttcttccactgagcgtcagaccccgtagaaaagatcaaaggatcttcttgagatcctttttctgcgctaactctgc  
tgcttgcaaacaaaaaacaccgctaccagcggtgggtttgttgcggatcaagagctaccaactcttttccgaaggtaactggcttcagcagagcg  
cagatacacaatactgtccttctagtgtagccgttagtgccaccacttcaagaactctgtagcaccgctacatacctcgtctgctaactcctgttacc  
agtggtgctgctccagtgagcagataagctgtgttaccgggttgactcaagacgatagttaccggataaggcgagcggtcgggctgaacggggggtt  
cgtgcacacagccagcttggagcgaacgacctacaccgaactgagatacctacagcgtgagctatgagaaaagcgcacgcttcccgaaggagaa  
aggcgagcaggtatccggtgaagcggcagggctggaacaggagagcgcacgagggagcttccaggggaaacgcctggtatctttatagtcctgtcg  
ggttccgacactgactgagcgtgattttgtgtagctcgtcagggggcgagcctatggaaaaacgcagcaacgcgcttcttacggttct  
ggccttttgcggccttttgcacatgttcttctcgttaccctgattctgtggaataaccgtattaccgctttgagtgagctgataaccgctcggc  
agccgaacgaccgagcgcagcagtgagtgagcaggaagcgggaagagcggcaatacgaacccgcttccccgcgcttggccgattcattaa  
tgagctggcagcagcaggttcccgactggaaagcgggagtgagcgcacgcaattaatgtgagttagctactcattaggcaccacaggcttaca  
ctttatgcttccggctgtagttgtggaattgtgagcggataacaattcacacaggaacagctatgaccatgattacccaagcgcgcaattaa  
ccctactaaaggaacaaaagctggagctgaagcttaatgtagctttagcaatactctgtagcttgaacatggttaacgatgagttagcaacat  
gccttacaaggagagaaaaagcaccgtgcatgccgattggtggaagtaagtggtacgatcgtgccttattaggaaggcaacagcgggtctgacat  
ggattggcgaaccactgaattgccgattgcagagatattgtattaaagtgcttagctgatacaataaacgggtctctggttagaccagatctga  
gcctgggagctcttggtaactagggaaaccactgcttaagcctcaataaagcttgccttgagtgctcaagtagtggtgcccgtctgttgtgactc  
tggtactagagatccctcagacccttttagtcagtggtgaaaatcttagcagtgggcggcgaacagggacctgaaagcgaagggaaccagagc  
tctctcagcagcaggactcggcttctgaagcgcgacggcaagaggcgagggcgagcactggtgagtagcggcaaaaattttagtagcggaggcta  
gaaggagagagatgggtgagagcgtcagtagtaagcgggggagaattagatcgcgatgggaaaaaattcggttaaggccaggggaaagaaa  
aaataaaatataacatatagtatgggcaagcaggagctagaacgattcgagttaatctggcctgtagaaacatcagaaggctgtagacaaa  
tactgggacagctacaacatccctcagacaggatcagaagaacttagatcattatataatacagtagcaaccctctattgtgtcatcaaaggata  
gagataaaagacaccaaggaagcttagacaagatagaggaagagcaaaaacaaaagtaagaccacgcagcaagcggccgctgatcttcaga  
cctggaggaggagataggggacaattggagaagtaattatataaataaaatagtagtaaaaattgaaccattaggagtagcaccaccaaggca  
aagagaagagtggtgagagagaaaaagcagtggggaataggagcttggcttgggttcttgggagcagcaggaagcactatggcgagcc  
tcaatgacgctgagcgtacaggccagacaattattgtctgtatagtgagcagcagaacaatttctgagggctattaggcgaacagcatctgtt  
gcaactcacagtctggggcatcaagcagctcaggcaagaatcctggctgtggaagatacctaaaggatcaacagctcctggggattgggggtgct  
ctggaaaactcatttgaccactgctgtccttggatgtagttggagtaataatctctggaacagatttggatcaacagcctggatggagtggg  
acagagaaattaacaattacacaagcttaatacactccttaattgaagaatcgaaaaccagcaagaaaagaatgaacaagaattattggaattag  
ataaatgggcaagtttgggaattggttaacatacaaaattggctgtggtatataaaattattcataatgatagtagggcttggtaggttaagaat  
agttttgctgactttctatagtagaattagtagtagcaggatattcaccattatcgtttcagacccacctccaaccccgaggggaccgcagggccc  
gaaggatagaagaagaaggtggagagagagacagagacagatccattcgattagtaacggatctcagcggatcgggttaactttaaaagaaa  
ggggggattgggggtacagtgcaggggaaagaatagtagacataatagcaacagacatacaaaacaaagaattacaaaaaaattacaaaaatt  
caaaatctatcgatcacgagactagcctcagagaagcttatatcgaattcccacggggttgggggtgctcctttccaaggcagccctgggttgcga  
gggacggcgtgcttggcgtggttccgggaaacgcagcggcggaccctgggtctgcacattctcagctccgttcgagcgtcaccggatctt

cgccgctacccttgtgggccccggcgacgcttctgctccccttaagtcgggaaggcttctgcggttcgggcgtgccggacgtgacaaacgga  
agccgcacgtctcactagtacctcgcagacggacagcgccaggagcaatggcagcgccgaccgcatgggctgtggccaatagcggctgctc  
agcggggcgccgagagcagcggccgggaagggcggtgctgggagggcggtgctggggcggtagtgtgggacctgttctgcccgcggtgttc  
cgattctgcaagcctccggagcgcacgtcggcagtcggctccctcgttgaccgaatcaccgacctctccccagggACCGGTATGGAAGAC  
GCCAAAAACATAAAGAAAGGCCCGGCCATTCTATCCGCTGGAAGATGGAACCGCTGGAGAGCAACTGCATAA  
GGCTATGAAGAGATACGCCCTGGTTCCTGGAACAATTGCTTTTACAGATGCACATATCGAGGTGGACATCACTTAC  
GCTGAGTACTTCGAAATGTCGGTTCGGTTGGCAGAAGCTATGAAACGATATGGGCTGAATACAAATCACAGAATC  
GTCGTATGCAGTGA-AACTCTTTCAATTCTTTATGCCGGTGTGGGCGCGTTATTTATCGGAGTTGCAGTTGCGCC  
CGCGAACGACATTTATAATGAACGTGAATTGCTCAACAGTATGGGCATTTTCGCAGCCTACCGTGGTGTTCGTTTCC  
AAAAAGGGGTTGCAAAAAATTTTGAACGTGCAAAAAAAGCTCCCAATCATCAAAAAATTATTATCATGGATTCTA  
AAACGGATTACCAGGGATTTTCAAGTGCATGTACACGTTCTGCATCTCATCTACCTCCCGGTTTTAATGAATACGAT  
TTTGTGCCAGAGTCCTTCGATAGGACAAGACAATTGCACTGATCATGAACTCCTCTGGATCTACTGGTCTGCCTA  
AAGGTGTCGCTCTGCCTCATAGAACTGCCTGCGTGAGATTCTCGCATGCCAGAGATCCTATTTTTGGCAATCAAATC  
ATTCCGATACTGCGATTTTAAAGTGTGTTCCATTCCATCACGGTTTTGGAATGTTTACTACACTCGGATATTTGATA  
TGTGGATTTTCGAGTCGTCTTAATGTATAGATTTGAAGAAGAGCTGTTTCTGAGGAGCCTTCAGGATTACAAGATTC  
AAAGTGCCTGCTGGTGCCAACCCTATTCTCCTTCTCGCAAAAAGCACTCTGATTGACAAATACGATTTATCTAAT  
TTACACGAAATTGCTTCTGGTGGCGCTCCCCTCTTAAGGAAGTCGGGAAGCGGTTGCCAAGAGGTTCCATCTGC  
CAGGTATCAGGCAAGGATATGGGCTCACTGAGACTACATCAGCTATTCTGATTACACCCGAGGGGGATGATAAC  
CGGGCGCGGTGGTAAAGTTGTTCCATTTTTGAAGCGAAGTTGTGGATCTGGATACCGGGAAAACGCTGGGGC  
TTAATCAAAGAGGCGAACTGTGTGTGAGAGGTCCTATGATTATGTCCGGTTATGTAAACAATCCGGAAGCGACCA  
ACGCCTTGATTGACAAGGATGGATGGCTACATTCTGGAGACATAGCTTACTGGGACGAAGACGAACACTTCTTCAT  
CGTTGACCGCCTGAAGTCTCTGATTAAGTACAAAGGCTATCAGGTGGCTCCCGCTGAATTGGAATCCATCTTGCTC  
CAACACCCCAACATCTTCGACGCAGGTGTCGCAGGTCTTCCCGACGATGACGCCGGTGAATTTCCCGCCCGGTTG  
TTGTTTTGGAGCACGAAAGACGATGACGGA AAAAGAGATCGTGATTACGTCGCCAGTCAAGTAACAACCGCG  
AAAAAGTTGCGCGGAGGAGTTGTGTTTGTGGACGAAGTACCGAAAGTCTTACCGGAAAACCTGACGCAAGAAA  
AATCAGAGAGATCCTCATAAAGGCCAAGAAGGGCGGAAAGATCGCCGTGTAAGtcgacaatcaacctctggattacaaat  
ttgtgaagattgactggtattcttaactatgttctccttttacgctatgtggatacgtctttaatgcctttgtatcatgctattgcttcccgatggttt  
cattttctcctcctgtataaatcctggttctgtctctttatgaggagttgtggcccgtgtcaggcaactggtggtgtgactgtgttctgacgca  
acccccactggttggggcattgccaccactgtcagctccttccgggacttccgcttccccctcctattgccacggcggactcatcgccgctgctt  
gcccgtgctggacaggggctcggctgtgggactgacaattccgtggtgttgcggggaagctgacgtcctttccatggctgctcctgtgttcca  
cctggattctgcgaggacgtccttctctacgtccctcggccctcaatccagcggacctcctccccgcgctgctgcccgtctgcccctctccg  
cgtcttgccttcgcccagacgagtcggatctcctttgggcccctccccgctggaattcgagctcggctaccttaagaccaatgacttacaaggc  
agctgtagatcttagccatttttaaagaaaagggggactggaagggctaattcactccaacgaagacaagatctgcttttctgtactgggtc  
tctctggttagaccagatctgagcctgggagctctctggctaactagggaaacctgcttaagcctcaataagcttgccttgagtcttcaagtagt  
tgtgccgtctgtgtgactctgtaactagagatccctcagacccttttagtcagtggtgaaatctctagcagtagtagttcatgtatcttattatt  
cagtattataacttgcaagaaatgaatatcagagagtgagaggaactgtttattgcagctataatggttacaataaagcaatagcatcaciaa  
tttcaaaataaagcattttttactgcatctagttgtggtttgcaaaactcatcaatgtatcttatcatgtctggcttagctatcccccccactcc  
gcccagttccgcccattctccgccccatggctgactaattttttattatgcagaggccgaggccgctcggcctctgagctattccagaagtagtgag  
gaggctttttggaggcctaggcttttgcgtcgagacgtaccaattcgcctatagttagctgattacgcgctcactggcctgcttttacaacgtc  
gtgactgggaaaacctggcgttacccaacttaatcgcttgcagcacatcccccttccgagctggcgtaatagcgaagaggccccaccgatcgc  
ccttccaacagttgcgacgctgaatggcgaatggcgcgacgccccttagcggcgcatgaagcggcggggtgtggtgttacgcgacgctga  
ccgctacacttgccagcgcctagcggcctcttctgcttcttccctccttctcgcacgttccggctttccccgtaagctctaaatcgggggct  
cccttagggttccgatttagtctttacggcacctcgaccccaaaaactgattagggtgatggttcacgtagtgggcatcgccctgatagacggtt

tffcgcctttgacgttgagtcacgttcttaatagtgactctgttccaaactggaacaacactcaaccctatctcggctattcttttgattataag  
ggatttgccgattcggcctattggttaaaaaatgagctgatttaacaaaattaacggaatttaacaaaatattaacgtttacaattcc
